# Supplementary material
Source: PubMed Central journal article supplement (PMC2570056)
Supplement: NIHMS60993-supplement-si20060110_113.pdf [file NIHMS60993-supplement-si20060110_113.pdf]

## Supporting Information

Supplemental Table 1: <sup>a</sup>Results of peptide mass mapping by MALDI-MS and ESI-MS for tryptic digest of mTR-3.

| Residue # | Sequence of Tryptic Fragments of mTR-3                                 | M+H <sup>+</sup><br>(predicted m/z) | Semisynthetic TR       |                      | Truncated TR           |                      |
|-----------|------------------------------------------------------------------------|-------------------------------------|------------------------|----------------------|------------------------|----------------------|
|           |                                                                        |                                     | MALDI-MS<br>(obs. m/z) | ESI-MS<br>(obs. m/z) | MALDI-MS<br>(obs. m/z) | ESI-MS<br>(obs. m/z) |
| 353-416   | SSTLMDYSNVPTTVFTPLEY<br>GCVGLSEEEAVALHGQEHVE<br>VYHAYYKLEFTVADRDSQCYIK | 7200.4                              | Not obs.               | Not obs.             | Not obs.               | Not obs.             |
| 308-340   | IIVDAQEATSVPHIYAIGDV<br>AEGRPELTPTAIK                                  | 3474.8                              | 3475.0                 | 3476.9               | 3474.7                 | 3476.9               |
| 188-216   | TLVVGASYVALECAGFLT<br>GIGLDTTVMMR                                      | 2988.5                              | Not obs.               | Not obs.             | Not obs.               | Not obs.             |
| 422-449   | EPPQLVLGLHFLGPNAGEV<br>TQGFALGIK                                       | 2902.6                              | 2902.5                 | 2904.3               | Not obs.               | 2904.3               |
| 222-244   | GFDQQMSSLVTEHMESH<br>GTQFLK                                            | 2637.2                              | 2637.3                 | 2638.9               | 2637.1                 | 2638.9               |
| 450-473   | CGASYAQVMQTVGIHPTCSE<br>EVVK                                           | 2537.2                              | 2535.3                 | Not obs.             | 2535.1                 | Not obs.             |
| 76-93     | DAHHYGWEVAQPVQHNWK<br>MGGQQSFDLLVIGGGSGGLA                             | 2202.0                              | 2202.1                 | 2203.3               | 2201.9                 | 2203.3               |
| 1-23      | CAK                                                                    | 2166.1                              | Not obs.               | Not obs.             | Not obs.               | Not obs.             |
| 253-270   | KLPTNQLQVTWEDHASGK                                                     | 2052.0                              | 2052.0                 | 2053.2               | 2051.9                 | 2053.2               |
| 143-160   | ATLLSAEHIVATGGRPR                                                      | 1862.1                              | 1862.0                 | 1863.1               | 1862                   | 1863.1               |
| 167-182   | GALEYGITSDDIFWLK                                                       | 1827.9                              | 1827.9                 | 1829                 | 1827.8                 | 1829                 |
| 271-285   | EDTGTFTVLWAIGR                                                         | 1680.8                              | 1680.8                 | 1681.8               | 1680.8                 | 1681.8               |
| 47-61     | WGLGGTCVNVGCIPK                                                        | 1503.7                              | 1501.5, 1503.7         | 1504.8               | 1501.6                 | Not obs.             |
| 63-75     | LMHQAALLGMIR                                                           | 1410.8                              | 1410.7                 | 1411.7               | 1410.7                 | 1411.8               |
| 32-43     | VAVADYVEPSR                                                            | 1302.7                              | 1302.6                 | 1303.4               | 1302.6                 | 1303.4               |
| 94-104    | TMAEAVQNHVK                                                            | 1227.6                              | 1227.6                 | 1228.4               | 1227.5                 | 1228.4               |
| 480-491   | SGLEPTVTGCUG (full length)                                             | 1169.4                              | Not obs.               | 1169.3               | Not applicable         | Not applicable       |
| 126-135   | ASFVDEHTVR                                                             | 1160.6                              | 1160.5                 | 1161.2               | 1160.5                 | 1161.2               |
| 479-488   | RSGLEPTVTG (truncated)                                                 | 1016.5                              | Not applicable         | Not applicable       | Not obs.               | 1017.1               |
| 105-111   | SLNWGHR                                                                | 869.4                               | 869.3                  | 869.9                | 869.3                  | 869.9                |

|         |                       |       |                |                |          |          |
|---------|-----------------------|-------|----------------|----------------|----------|----------|
| 480-488 | SGLEPTVTG (truncated) | 860.4 | Not applicable | Not applicable | Not obs. | 860.3    |
| 245-252 | GCVPSHIK              | 840.4 | 840.4          | 841.0          | Not obs. | Not obs. |
| 297-304 | AGISTNPK              | 787.4 | 787.1          | 787.9          | Not obs. | Not obs. |
| 112-117 | VQLQDR                | 758.4 | 758.3          | Not obs.       | 758.3    | Not obs. |
| 161-166 | YPTQVK                | 735.4 | 735.3          | 735.8          | 735.3    | Not obs. |
| 291-296 | TLNLEK                | 717.4 | Not obs.       | 717.8          | Not obs. | 717.8    |
| 24-30   | EAAQLGK               | 716.4 | Not obs.       | Not obs.       | Not obs. | Not obs. |
| 121-125 | YFNIK                 | 684.4 | 684.2          | 684.8          | 684.3    | Not obs. |
| 417-421 | MVCMR                 | 639.3 | 639.2          | Not obs.       | 639.2    | Not obs. |
| 286-290 | VPETR                 | 601.3 | Not obs.       | Not obs.       | Not obs. | Not obs. |
| 344-348 | LLAQR                 | 600.4 | Not obs.       | Not obs.       | Not obs. | Not obs. |
| 474-478 | LHISK                 | 597.4 | Not obs.       | 597.7          | 597.3    | Not obs. |
| 217-221 | SIPLR                 | 585.4 | 585.3          | Not obs.       | 585.3    | Not obs. |

<sup>a</sup>The truncated and semisynthetic forms of mTR-3 were digested by trypsin as described in the Methods and then peptides were analyzed by both MALDI-MS and ESI-MS. Each peptide identified by ESI-MS was verified by MS/MS fragmentation. 70% of the total peptide sequence was verified using both forms of MS. The C-terminal fragment containing selenocysteine was verified by ESI-MS. The reduced and oxidized forms of the truncated enzyme were analyzed by MALDI-MS and at least one peptide could be identified in both oxidation states. For analysis by ESI-MS, only the oxidized form of the peptide was digested by trypsin. The C-terminus of the truncated enzyme was identified by ESI-MS in the carboxylate form.

Supplemental Figure 1

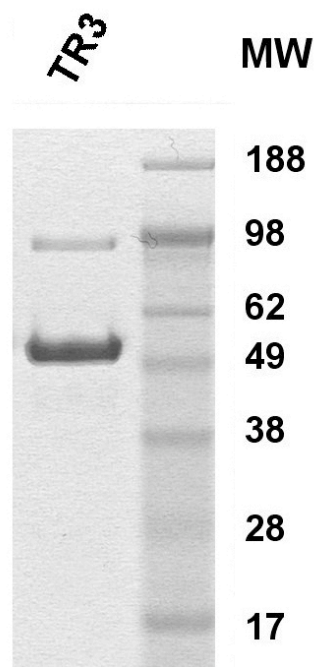

12% SDS-PAGE gel of mouse TR3 produced as full-length selenocysteine-containing enzyme using the engineered SECIS element method in *E. coli* cells. The enzyme is produced and purified as described in the Methods.

Supplemental Figure 2

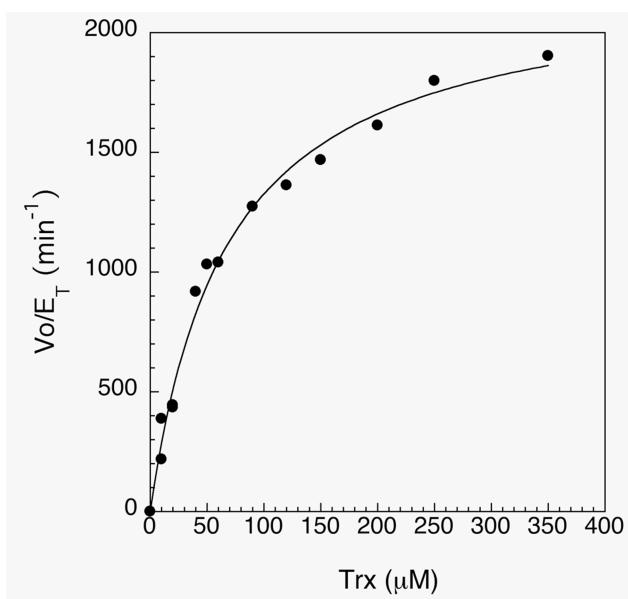

Michaelis-Menten plot of the semisynthetic TR (optimized protocol) using Trx as substrate. This enzyme, which has a Se content of 91%, has a  $k_{\text{cat}}$  of  $2220 \text{ min}^{-1}$  as determined by fitting the data to the Michaelis-Menten equation.
